# Supplementary material for: Non-invasive assessment of NAFLD as systemic disease—A machine learning perspective
Source: PubMed Central journal article supplement (PMC6435145; doi:10.1371/journal.pone.0214436), 2019-03-26
Supplement: pone.0214436.s005.pdf [file pone.0214436.s005.pdf]

**Supplementary Table 1: Significant correlations of the new score with available parameters in a subgroup of the lifestyle intervention cohort at T0.**

| <b>Parameter</b>                     | <b>Number of Pairs</b> | <b>Spearman r</b> | <b>95% confidence interval</b> | <b>P value</b> |
|--------------------------------------|------------------------|-------------------|--------------------------------|----------------|
| Sex                                  | 38                     | 0.4207            | 0.1069 to 0.6582               | 0.0085         |
| Phase angle                          | 38                     | 0.3645            | 0.04086 to 0.6189              | 0.0245         |
| Basal metabolic rate                 | 38                     | 0.4503            | 0.1429 to 0.6785               | 0.0046         |
| ECM/BCM-Index                        | 38                     | -0.3657           | -0.6198 to -0.04226            | 0.024          |
| Body fat %                           | 38                     | -0.3899           | -0.6369 to -0.07040            | 0.0155         |
| R (bioelectrical impedance analysis) | 38                     | -0.4175           | -0.6560 to -0.1031             | 0.0091         |
| AST                                  | 36                     | 0.372             | 0.03931 to 0.6304              | 0.0255         |
| HDL                                  | 38                     | -0.4433           | -0.6737 to -0.1343             | 0.0053         |
| Hb                                   | 38                     | 0.3849            | 0.06458 to 0.6334              | 0.017          |
| Ht %                                 | 38                     | 0.3855            | 0.06527 to 0.6338              | 0.0168         |
| Waist circumference                  | 38                     | 0.4037            | 0.08665 to 0.6465              | 0.012          |
| Waist/Hip ratio                      | 38                     | 0.4607            | 0.1558 to 0.6855               | 0.0036         |
| Fatty liver index                    | 38                     | 0.473             | 0.1711 to 0.6937               | 0.0027         |
