# Supplementary material for: Non-invasive assessment of NAFLD as systemic disease—A machine learning perspective
Source: PubMed Central journal article supplement (PMC6435145; doi:10.1371/journal.pone.0214436), 2019-03-26
Supplement: pone.0214436.s006.pdf [file pone.0214436.s006.pdf]

**Supplementary Table 2: Significant correlations of the new score with available parameters in a subgroup of the lifestyle intervention cohort at T52.**

| <b>Parameter</b>                     | <b>Number of Pairs</b> | <b>Spearman r</b> | <b>95% confidence interval</b> | <b>P value</b> |
|--------------------------------------|------------------------|-------------------|--------------------------------|----------------|
| Steatosis in ultrasound              | 28                     | 0.4388            | 0.06700 to 0.7036              | 0.0195         |
| Phase angle                          | 38                     | 0.325             | -0.003902 to 0.5905            | 0.0465         |
| Basal metabolic rate                 | 38                     | 0.4012            | 0.08374 to 0.6448              | 0.0125         |
| R (bioelectrical impedance analysis) | 38                     | -0.4035           | -0.6463 to -0.08638            | 0.012          |
| AST                                  | 38                     | 0.3688            | 0.04582 to 0.6220              | 0.0227         |
| ALT                                  | 38                     | 0.4913            | 0.1941 to 0.7059               | 0.0017         |
| Uric acid                            | 38                     | 0.4299            | 0.1181 to 0.6646               | 0.0071         |
| Serum triglycerides                  | 38                     | 0.3803            | 0.05917 to 0.6301              | 0.0185         |
| HDL                                  | 38                     | -0.4729           | -0.6936 to -0.1709             | 0.0027         |
| Waist circumference                  | 37                     | 0.4377            | 0.1226 to 0.6726               | 0.0067         |
| Waist/Hip ratio                      | 37                     | 0.4197            | 0.1009 to 0.6604               | 0.0097         |
| Ghrelin                              | 38                     | -0.4409           | -0.6720 to -0.1314             | 0.0056         |
| Fatty liver index                    | 38                     | 0.438             | 0.1279 to 0.6701               | 0.006          |
